# Supplementary material for: Lysosomotropic challenge of mast cells causes intra-granular reactive oxygen species production
Source: PubMed Central journal article supplement (PMC6520368; doi:10.1038/s41420-019-0177-3), 2019-05-15
Supplement: 41420_2019_177_MOESM1_ESM.pdf [file 41420_2019_177_MOESM1_ESM.pdf]

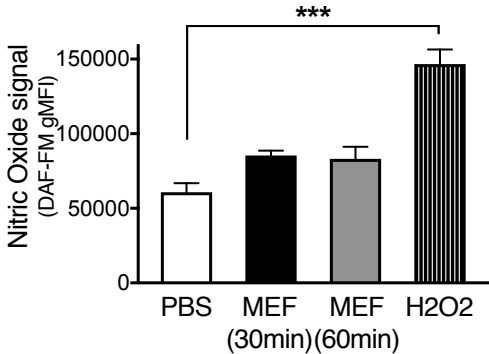

**Figure S1**
